# Supplementary material
Source: PubMed Central journal article supplement (PMC4006695)
Supplement: NIHMS574333-supplement-supplement_2.pdf [file NIHMS574333-supplement-supplement_2.pdf]

# Supplemental Figure 1

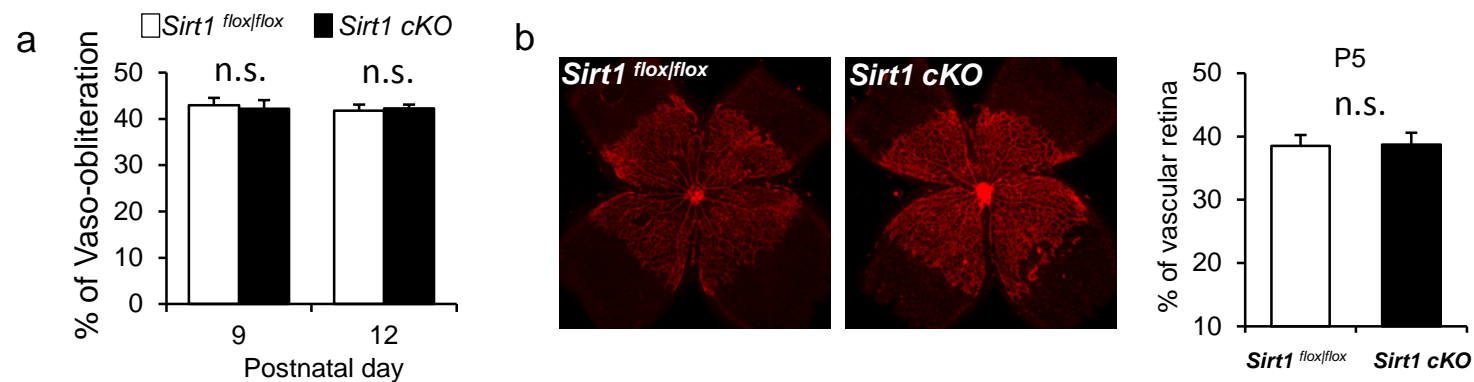

**Supplemental Figure 1:** Loss of neuronal Sirt1 does not change initial vessel loss in OIR and developmental angiogenesis. a) *Sirt1*<sup>cKO</sup> retinas showed similar levels of vaso-obliteration at P9 and P12 in OIR compared to littermate controls (*Sirt1*<sup>flox/flox</sup>). (n=6-10 per group). b) *Sirt1*<sup>cKO</sup> retinas and littermate controls (*Sirt1*<sup>flox/flox</sup>) flat mounts show identical levels of retinal vascularization at P5. (n=7-19 per group). n.s.: not significant.

## Supplemental Figure 2

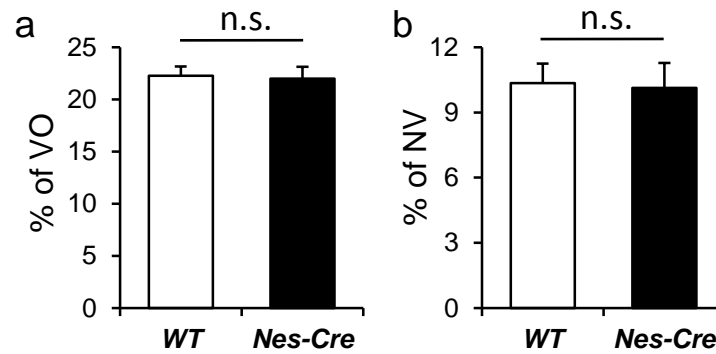

**Supplemental Figure 2:** Expression of Cre recombinase in nestin-expressing cells does not influence a) vaso-obliteration (VO), or b) neovascularization (NV) in OIR (n=15-18 per group). n.s.: not significant.

# Supplemental Figure 3

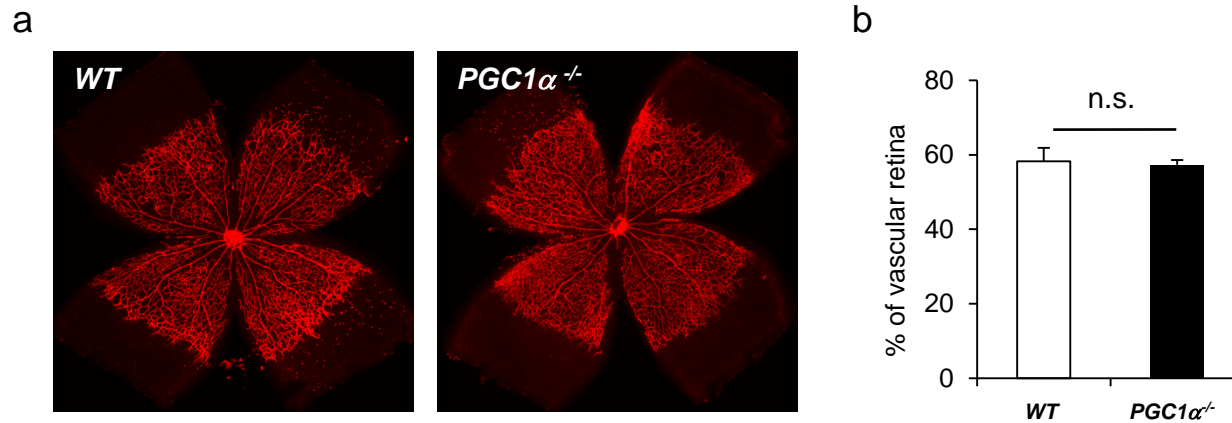

**Supplemental Figure 3:** Retinal vasculature of *PGC-1α<sup>-/-</sup>* retinas and wild type (WT) littermate controls at P5. a) Representative retinal flat mounts of *PGC-1α<sup>-/-</sup>* and wild type (WT) littermate control mice. b) Quantification analysis of *PGC-1α<sup>-/-</sup>* and littermate control WT retinas shows similar levels of vascularized retinal area at P5 (n=8 per group). n.s.: not significant.

# Supplemental Figure 4

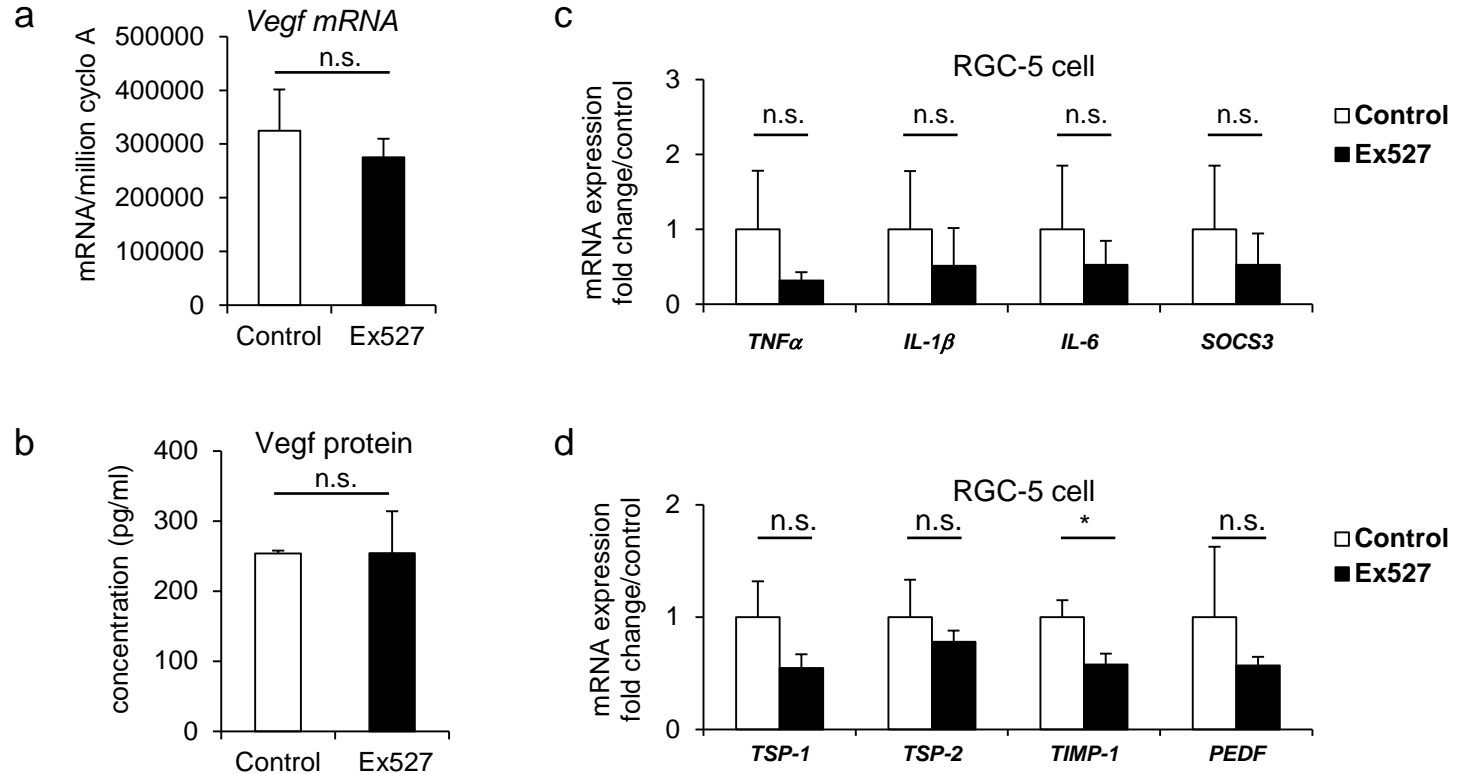

**Supplemental Figure 4:** Expression of VEGF, anti-angiogenic factors and inflammatory mediators in RGC-5 cell culture treated with Sirt1 inhibitor Ex527. a) Expression levels of *Vegf* mRNA in RGC-5 cells treated with Sirt1 inhibitor Ex527. b) Protein levels of VEGF in RGC-5 cells treated with Sirt1 inhibitor Ex527. c) Expression of inflammatory mediators *TNF $\alpha$* , *IL-1 $\beta$* , *IL-6*, *SOCS3* mRNA in RGC-5 cells treated with Sirt1 inhibitor Ex527. d) Expression of anti-angiogenic factors *TSP-1*, *TSP-2*, *TIMP-1*, *PEDF* mRNA in RGC-5 cells treated with Sirt1 inhibitor Ex527. n.s.: not significant.
